# Supplementary material for: Effect of R-site element on crystalline phase and thermal stability of Fe substituted Mn mullite-type oxides: R2(Mn1−xFex)4O10−δ (R = Y, Sm or Bi; x = 0, 0.5, 1)
Source: Royal Society of Chemistry journal article supplement (doi:10.1039/c7ra09699b), 2017-12-19
Supplement: c7ra09699b1.pdf [file c7ra09699b1.pdf]

## Supplementary Information

### Effect of R-site Element on Crystalline Phase and Thermal Stability of Fe Substituted Mn Mullite-type Oxides: $R_2(Mn_{1-x}Fe_x)_4O_{10-\delta}$ ( $R = Y, Sm$ or $Bi$ ; $x = 0, 0.5, 1$ )

Sampreetha Thampy,<sup>a</sup> Nickolas Ashburn,<sup>a</sup> Thomas J. Martin,<sup>b</sup> Chenzhe Li,<sup>c</sup> Yongping Zheng,<sup>a</sup> Julia Y. Chan,<sup>b</sup> Kyeongjae Cho,<sup>a</sup> and Julia W. P Hsu<sup>a\*</sup>

<sup>a</sup>Department of Materials Science and Engineering, University of Texas at Dallas, Richardson, TX 75080, USA

<sup>b</sup>Department of Chemistry and Biochemistry, University of Texas at Dallas, Richardson, TX 75080, USA

<sup>c</sup>School of Mechanical and Aerospace Engineering, Seoul National University, Seoul 151-742, Republic of Korea

\* Corresponding author: Department of Materials Science and Engineering, University of Texas at Dallas, Richardson, Texas 75080, USA; Phone: +1 (972) 883-5789

E-mail: [jwhsu@utdallas.edu](mailto:jwhsu@utdallas.edu)

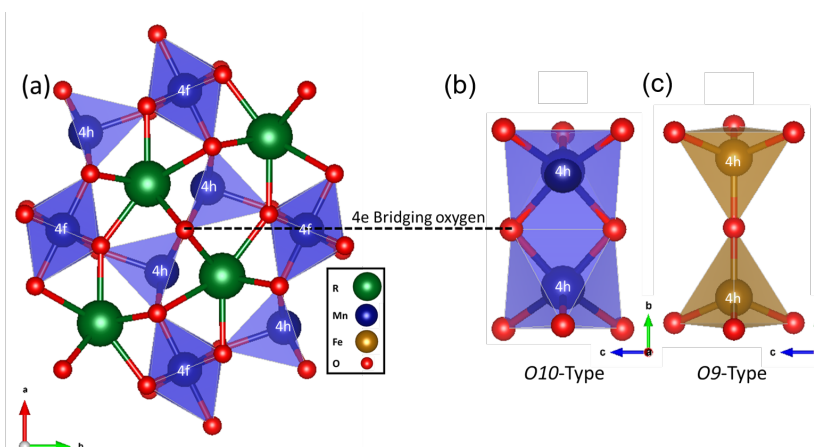

**Fig. S1.** (a) Crystal structure of mullite-type oxides. Atoms are labeled with their Wyckoff symbols. (b) Edge-shared MO<sub>5</sub> square pyramids in O10-type structure. (c) Vertex-sharing MO<sub>4</sub> tetrahedral in O9-type structure. Green, blue, brown, and red balls represent R, Mn, Fe, and O atoms, respectively.

**Table S1.** U values used in this work for oxide systems and the energy adjustments between previous work and this work.

| Element | $U_{\text{eff}}$ (eV) | $\Delta E_M$ (eV) | $\Delta E_M$ (eV) <sup>a</sup> |
|---------|-----------------------|-------------------|--------------------------------|
| Fe      | 4.0                   | 2.0               | 1.7                            |
| Mn      | 3.9                   | 1.8               | 1.7                            |

<sup>a</sup>Ref. 1

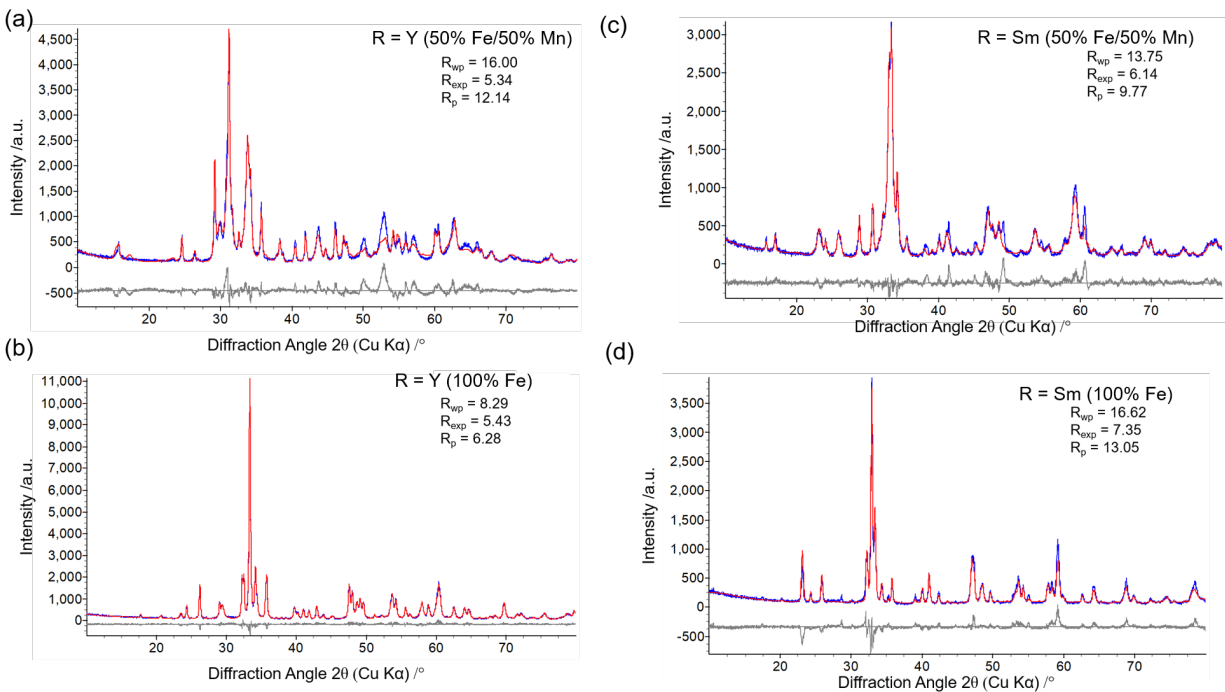

**Fig. S2.** Rietveld refinement plot of (a, b) R = Y; (c, d) R = Sm for 50% Fe/50% Mn and 100% Fe, respectively in the reactants. The blue, red, and grey lines represent the experimental, calculated, and difference patterns, respectively. Phase compositions and lattice parameters for the mullite-type compounds are summarized in Table S2 and S3, respectively.  $\lambda_{K\alpha 1} = 0.15406$  nm wavelength was used in the refinement.

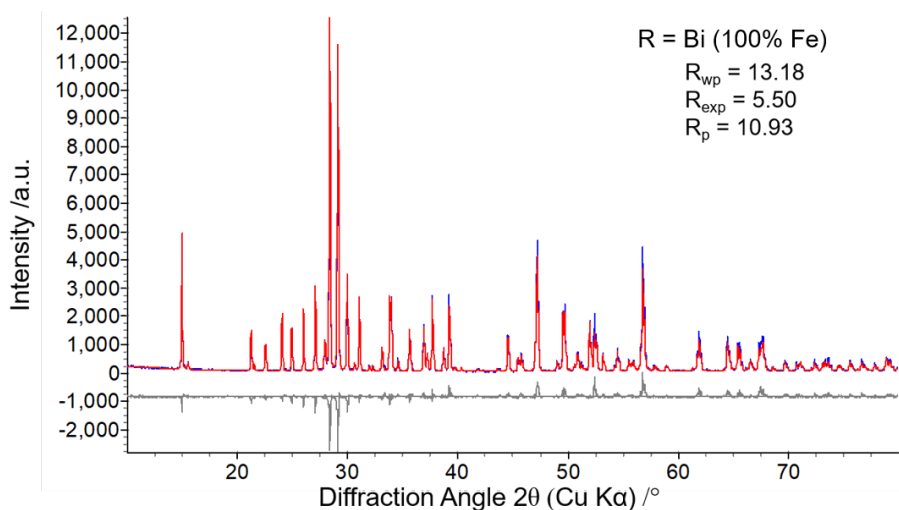

**Fig. S3.** Rietveld refinement plot of  $\text{Bi}_2\text{Fe}_4\text{O}_9$ . The blue, red, and grey lines represent the experimental, calculated, and difference patterns, respectively. Phase compositions and lattice parameters for the mullite-type compounds are summarized in Table S2 and S3, respectively.  $\lambda_{K\alpha 1} = 0.15406$  nm wavelength was used in the refinement.

**Table S2.** Phase composition of  $R_2(Mn_{1-x}Fe_x)_4O_{10-\delta}$  (R = Y, Sm, Bi)

| R-site | M-site        | Phase Composition                                                                                                                      | % Phase Purity                          |
|--------|---------------|----------------------------------------------------------------------------------------------------------------------------------------|-----------------------------------------|
| Y      |               |                                                                                                                                        |                                         |
|        | 100% Mn       | $Y_2Mn_4O_{10}$                                                                                                                        | 100                                     |
|        | 50% Fe/50% Mn | $Y_2Mn_{1.88(2)}Fe_{1.87(2)}O_{10}$<br>YFeO <sub>3</sub><br>Mn <sub>2</sub> O <sub>3</sub><br>YMnO <sub>3</sub>                        | 55.3(5)<br>20.9(4)<br>16.4(6)<br>7.4(1) |
|        | 100% Fe       | YFeO <sub>3</sub><br>Fe <sub>2</sub> O <sub>3</sub><br>Y <sub>3</sub> Fe <sub>5</sub> O <sub>12</sub><br>Y <sub>2</sub> O <sub>3</sub> | 56.6(1)<br>27.4(1)<br>10.5(1)<br>5.5(1) |
| Sm     |               |                                                                                                                                        |                                         |
|        | 100% Mn       | $Sm_2Mn_4O_{10}$                                                                                                                       | 100                                     |
|        | 50% Fe/50% Mn | $Sm_2Mn_{2.22(3)}Fe_{2.00(4)}O_{10}$<br>SmFeO <sub>3</sub><br>Mn <sub>2</sub> O <sub>3</sub>                                           | 18.2(3)<br>47.0(5)<br>34.8(5)           |
|        | 100% Fe       | SmFeO <sub>3</sub><br>Fe <sub>2</sub> O <sub>3</sub>                                                                                   | 72.1(4)<br>27.9(4)                      |
| Bi     |               |                                                                                                                                        |                                         |
|        | 100% Mn       | $Bi_2Mn_4O_{10}$                                                                                                                       |                                         |
|        | 50% Fe/50% Mn | $Bi_2Mn_{2.23(4)}Fe_{2.00(2)}O_{10}$<br>Bi <sub>2</sub> Fe <sub>4.00(4)</sub> O <sub>9</sub><br>Mn <sub>2</sub> O <sub>3</sub>         | 54.4(4)<br>41.8(4)<br>3.8(3)            |
|        | 100% Fe       | Bi <sub>2</sub> Fe <sub>4.16(1)</sub> O <sub>9</sub><br>Bi <sub>2</sub> O <sub>3</sub><br>BiFeO <sub>3</sub>                           | 95.1(1)<br>4.0(1)<br>0.9(1)             |

**Table S3.** Rietveld refined and simulated lattice parameters and Fe ground state occupation sites in the single unit cell for  $R_2(Mn_{1-x}Fe_x)_4O_{10-\delta}$  (R = Y, Sm, Bi).

| R = Y                | Experimental (nm) |             |             | Theoretical (nm) |          |          |                        |
|----------------------|-------------------|-------------|-------------|------------------|----------|----------|------------------------|
|                      | <i>a</i>          | <i>b</i>    | <i>c</i>    | <i>a</i>         | <i>b</i> | <i>c</i> | Fe                     |
| 100% Mn <sup>a</sup> | 0.72667(6)        | 0.84732(6)  | 0.56663(4)  | 0.736            | 0.855    | 0.576    | -                      |
| 50%Fe/50%Mn          | 0.72801(10)       | 0.84625(12) | 0.56746(8)  | 0.733            | 0.860    | 0.577    | 4 <i>h</i>             |
|                      |                   |             |             |                  |          |          |                        |
| R = Sm               | <i>a</i>          | <i>b</i>    | <i>c</i>    | <i>a</i>         | <i>b</i> | <i>c</i> |                        |
| 100% Mn <sup>a</sup> | 0.74296(4)        | 0.85802(5)  | 0.56908(3)  | 0.751            | 0.866    | 0.578    | -                      |
| 50%Fe/50%Mn          | 0.74190(20)       | 0.85680(20) | 0.56837(15) | 0.749            | 0.870    | 0.578    | 4 <i>h</i>             |
|                      |                   |             |             |                  |          |          |                        |
| R = Bi               | <i>a</i>          | <i>b</i>    | <i>c</i>    | <i>a</i>         | <i>b</i> | <i>c</i> |                        |
| 100% Mn <sup>a</sup> | 0.75652(2)        | 0.85370(2)  | 0.57635(1)  | 0.759            | 0.864    | 0.584    | -                      |
| 50%Fe/50%Mn          |                   |             |             | 0.758            | 0.873    | 0.583    | 4 <i>h</i>             |
| <i>O10</i> -type     | 0.76066(8)        | 0.84996(10) | 0.58019(6)  |                  |          |          |                        |
| <i>O9</i> -type      | 0.77083(9)        | 0.84452(11) | 0.58682(6)  |                  |          |          |                        |
| 100% Fe              | 0.79689(2)        | 0.84487(2)  | 0.60093(1)  | 0.808            | 0.855    | 0.610    | 4 <i>f</i> ,4 <i>h</i> |

<sup>a</sup> Ref. 1

Figure. S4 shows the density of states (DOS) for unstable  $Bi_2Fe_4O_{10}$  (*O10*) and stable  $Bi_2Fe_4O_9$  (*O9*) compounds with 100% Fe substitution. According to crystal field theory, Fe d-electrons in octahedral (4*f*) and polyhedral (4*h*) sites follow high spin  $3d^5$  state.<sup>2</sup> In *O10*-type structure (Fig. S4a), the increase in Fe concentration ( $x \geq 0.6$ ) forces Fe into the 4*f* octahedral sites resulting in significant Jahn-Teller distortion; the  $e_g$  and  $t_{2g}$  states of Fe in 4*f* octahedra show further splitting into five different recognizable states, including an empty state in the middle of the band gap (labeled as  $t_{2g}^*$  and  $e_g^*$  in Fig. S4a). This new empty state indicates an increase in the oxidation state of Fe greater than 3+, which leads to Fe instability. Moreover, the empty state results in the removal of an additional electron from the half-filled d shell along with an increase in the minority spin caused by an increase in bonded electrons. This is energetically unfavorable per Hund's Rule and Fe's strong exchange interaction<sup>3</sup> resulting in decreased stability of *O10*-type structure (Fig. 6). Contrary to the distorted Fe octahedral occupation in *O10*-type structures, Fe in pyramidal sites (Fig. S4b) show no clear evidence for serious Jahn-Teller distortion and therefore does not decrease the system stability. For *O9*-type structure, there is no over oxidation of Fe in the substituted octahedral (Fig. S4c) or tetrahedral sites (Fig. S4d), thus no  $e_g$  or  $t_{2g}$  states below the Fermi level. Since *O9*-type structures have 3+ octahedral and tetrahedral sites, we see stable Fe substitution into both locations resulting in a DOS similar to that found in the *O10*-type

pyramidal sites. This exchange interaction induced separation of occupied majority spin states from unoccupied minority spin states gives Fe its most stable configuration with a half-filled d-shell allowing for *O9*-type formation.

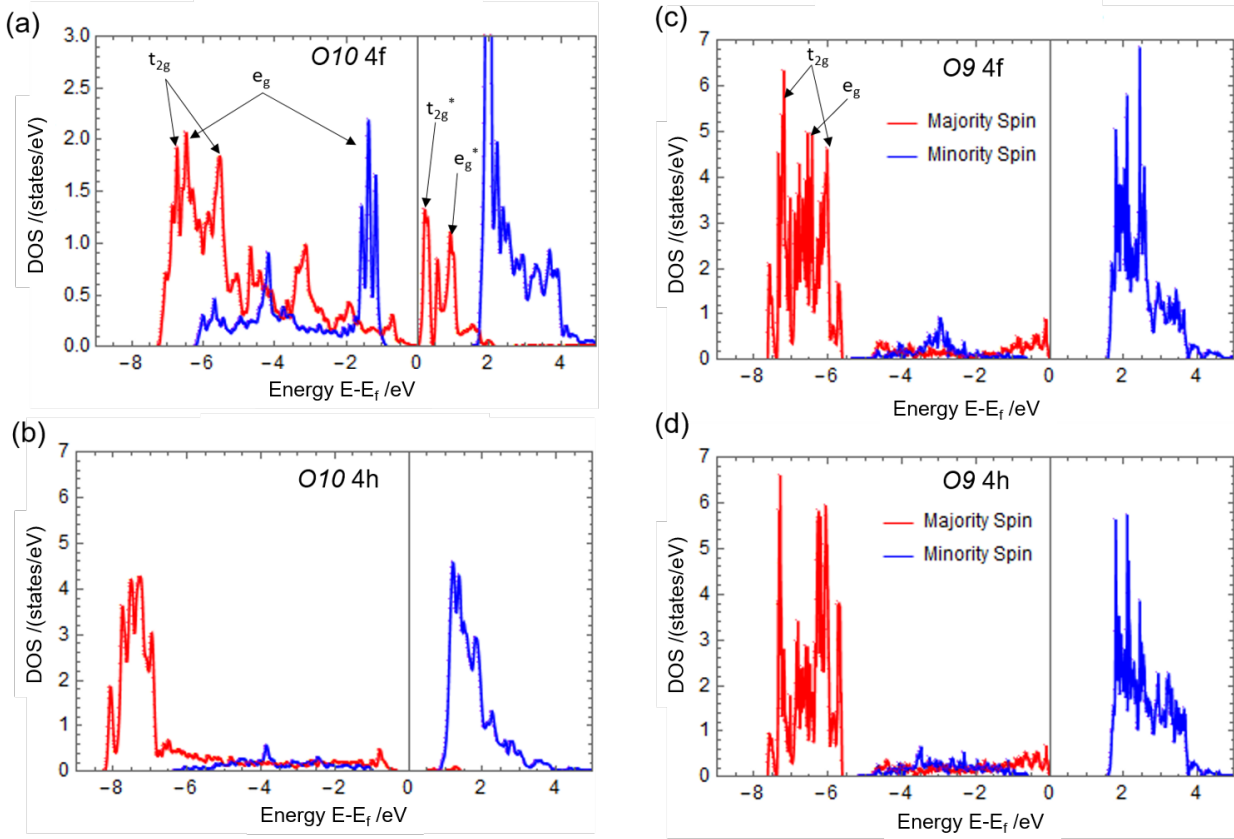

**Fig. S4.** Density of states for (a, b)  $\text{Bi}_2\text{Fe}_4\text{O}_{10}$  (*O10*) and (c, d)  $\text{Bi}_2\text{Fe}_4\text{O}_9$  (*O9*). States of Fe d-electrons in (a) *4f* octahedral and (b) *4h* pyramid sites in  $\text{Bi}_2\text{Fe}_4\text{O}_{10}$ , respectively. (c) *4f* octahedral and (d) *4h* tetrahedral sites in  $\text{Bi}_2\text{Fe}_4\text{O}_9$ , respectively. Red and blue represents majority and minority spins, respectively. (\*Total DOS was divided by 5 to clearly illustrate Fe p-DOS.).

In contrast to Fe, Mn compound shows a lower stability in *O9*-type structures (Fig. S5a). In  $\text{Bi}_2\text{Mn}_4\text{O}_9$  *O9*-type structure, octahedral chains show high d orbital electron density right below the Fermi level (Fig. S5a, black arrow). This indicates that Mn atoms are still highly reactive. On the other hand, in *O10*-type structure DOS for the *4f* octahedral site (Fig. S5b) shows an electron density decrease (Fig. S5b, black arrow) while the non-bonding states (Fig. S5b, green arrow) increase above Fermi level. This is due to the higher oxidation state of Mn to  $4+$ , resulting in lower reactivity from Mn atoms and no Jahn-Teller distortion, hence a more stable structure. Because  $\text{Mn}^{3+}$  is known to have stable first order Jahn-Teller distortion,<sup>4</sup> having

$\text{Mn}^{3+}$  ion in the  $4f$  octahedral site of  $O9$ -type will destabilize the structure as  $\text{Mn}^{3+}$  would attempt to elongate the  $z$  direction. Consequently, these  $\text{Mn}^{3+}$  substituted octahedral sites exhibit small amounts of second order Jahn-Teller distortion in the  $a$ - $b$  plane attempting to compensate for lack of first order Jahn-Teller distortion, decreasing stability of  $O9$ -type Mn compound.  $\text{Mn}^{3+}$  is also unstable when placed in a tetrahedral site in the  $O9$ -type structure; in the tetrahedral site, the formation energy is 0.8 eV lower than that of Mn substituted octahedral sites due to lack of Jahn-Teller distortion. Thus, it is difficult to form pure Mn compounds with  $O9$ -type structure. These results clearly show that the pure Fe compound can never form stable  $\text{Bi}_2\text{Fe}_4\text{O}_{10}$   $O10$ -type structure and the pure Mn compound can never form stable  $\text{Bi}_2\text{Mn}_4\text{O}_9$   $O9$ -type structure.

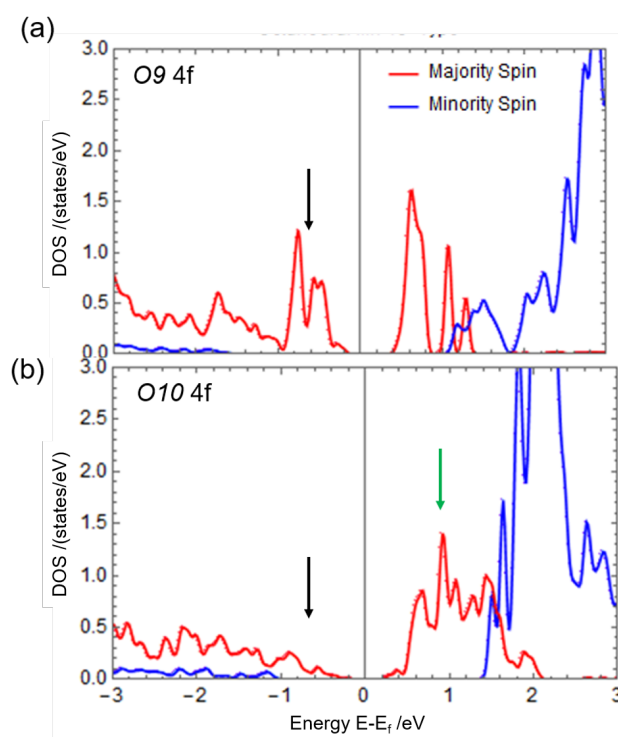

**Fig. S5.** Density of states for  $4f$  octahedral Mn d-shell electrons in (a)  $\text{Bi}_2\text{Mn}_4\text{O}_9$   $O9$ -type and (b)  $\text{Bi}_2\text{Mn}_4\text{O}_{10}$   $O10$ -type. The black arrows show high  $d$  orbital electron density right below the Fermi level. The green arrow shows the formation of additional non-bonding states representing the higher oxidation state of Mn. Red and blue represents majority and minority spins, respectively.

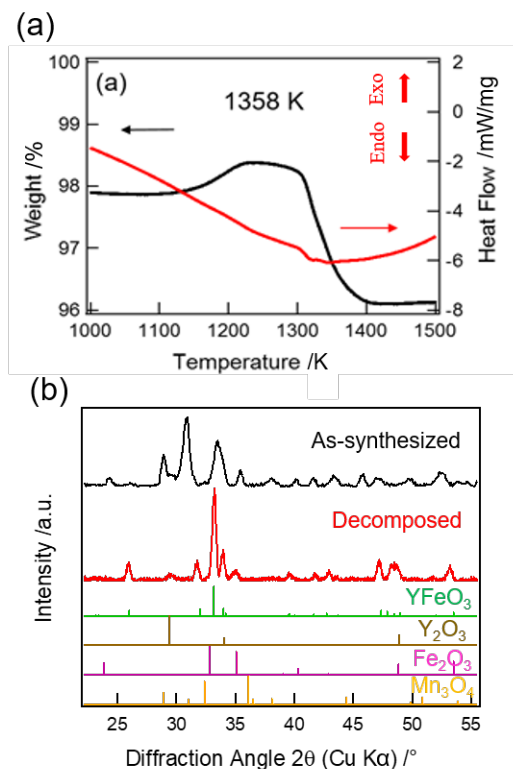

**Fig. S6.** (a) Zoom in view of TGA (black) and DSC (red) curves showing the decomposition region for  $R = Y$  for 50% Fe and 50% Mn in the reactants. (b) XRD pattern of as-synthesized (black) and decomposed (red) samples, respectively. Respective reference diffraction data are shown.

## References

- 1 C. Li, S. Thampy, Y. Zheng, M. Kweun, Y. Ren, J. Y. Chan, H. Kim, Cho, M. Cho Y. Y. Kim, J. W. P. Hsu and K. Cho, *J. Phys.: Condens. Matter*, 2016, **28**, 125602 (pp1-10).
- 2 J. B. Goodenough, *Ann. Rev. Mater. Sci.*, 1998, **28**, 1-27.
- 3 I. B. Bersuker. *Chem. Rev.*, 2013, **113**, 1351-1390.
- 4 K. Fantai, R. C. Longo, M. S. Park, J. Yoon, D. H. Yeon, J. H. Park, W. H. Wang, K. C. Santosh, S. G. Doo and K. Cho, *J. Mater. Chem. A*, 2015, **3**, 8489-8500.
